# Supplementary material for: Untapped potential of scrap brass alloy: a new frontier in the use of brass-based photocathodes for stable and durable photoelectrochemical water splitting
Source: Royal Society of Chemistry journal article supplement (doi:10.1039/d3ya00534h), 2024-01-01
Supplement: d3ya00534h1.pdf [file d3ya00534h1.pdf]

## Supporting Information

### Untapped Potential of Scrap Brass Alloy: A New Frontier in the Use of Brass-Based Photocathodes for Stable and Durable Photoelectrochemical Water Splitting

Rahma Leil<sup>1</sup>, Mohamed Mahrous Abodouh<sup>1</sup>, Nasir Javed<sup>2</sup>, Sneha Sreekumar<sup>2</sup>, Haydee Pacheco<sup>2</sup>,  
Nada Tarek<sup>1</sup>, Deirdre M. O'Carroll<sup>2</sup>, and Nageh K. Allam<sup>1,\*</sup>

<sup>1</sup>Energy Materials Laboratory, Physics Department, School of Sciences and Engineering,  
The American University in Cairo (AUC), New Cairo 11835, Egypt

<sup>2</sup>Department of Materials Science and Engineering, Rutgers University, New Brunswick, New  
Jersey, United States

\* Corresponding Author's email: [nageh.allam@aucegypt.edu](mailto:nageh.allam@aucegypt.edu)

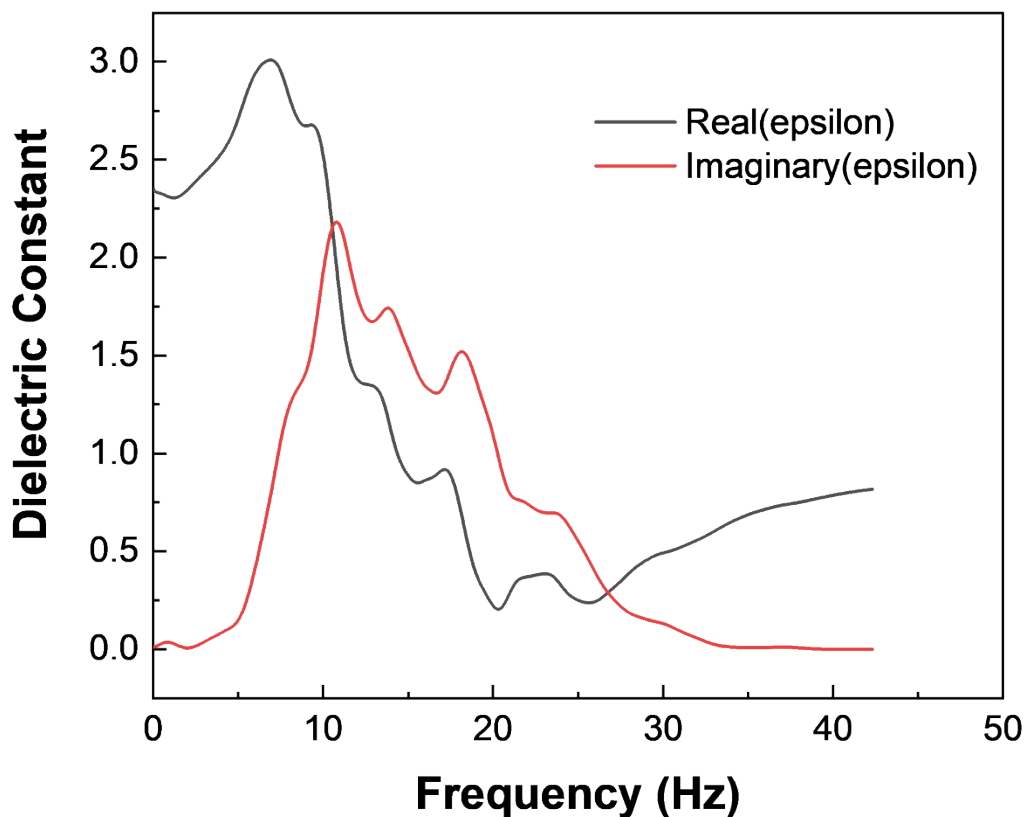

Figure S1. Dielectric Function of CuZnO.

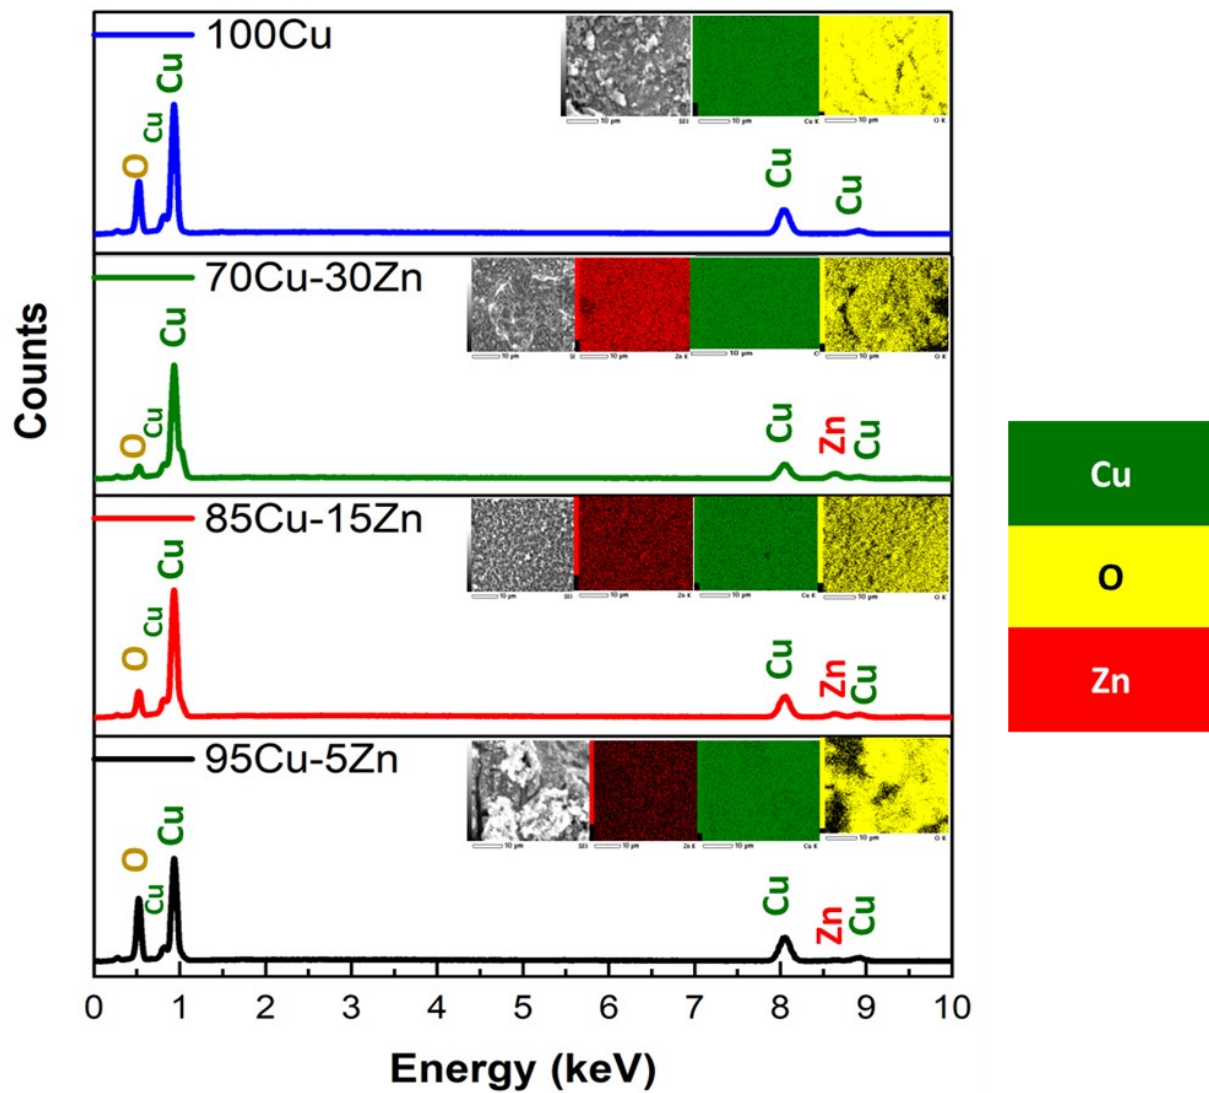

Figure S2. Elemental mapping of the samples after being anodized.

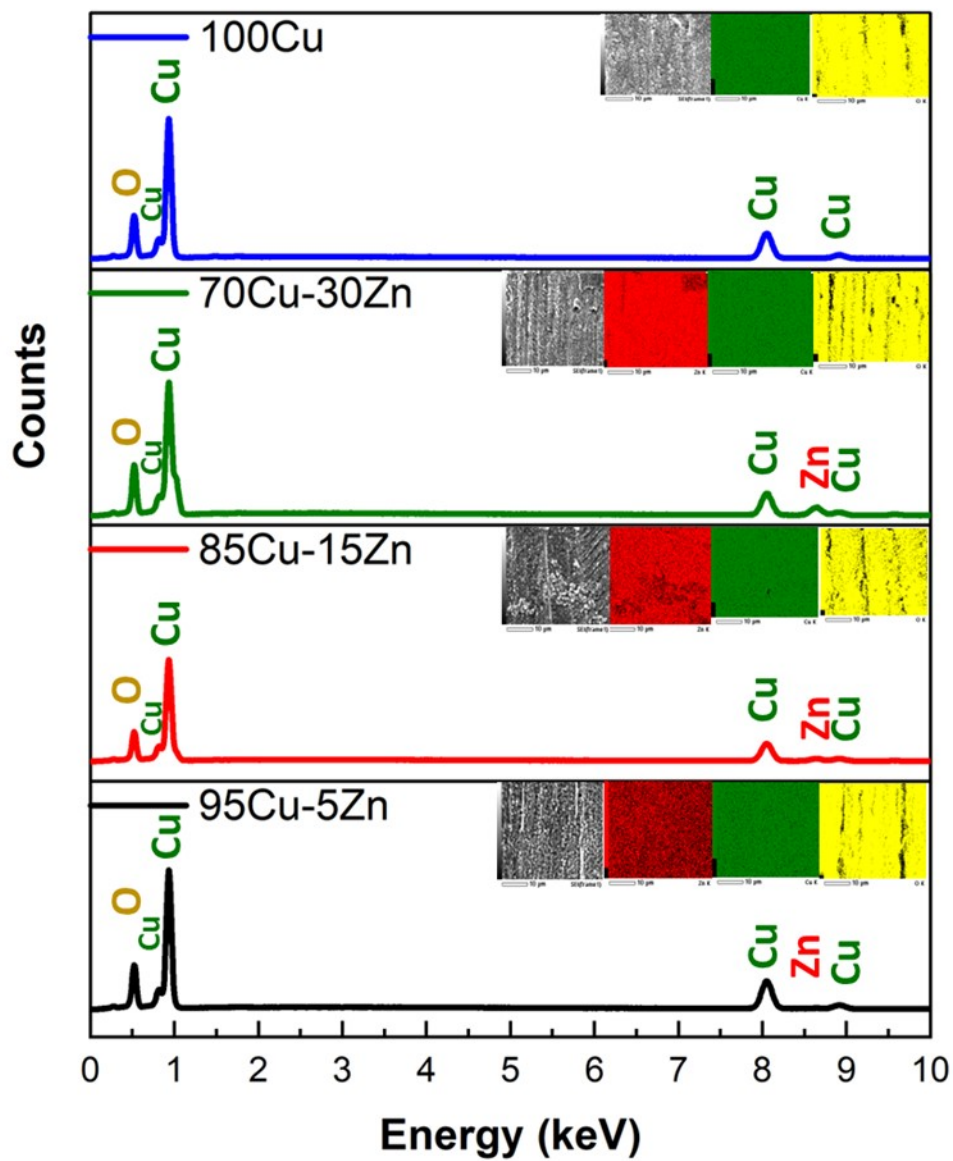

**Figure S3.** Elemental mapping of the samples after being annealed.

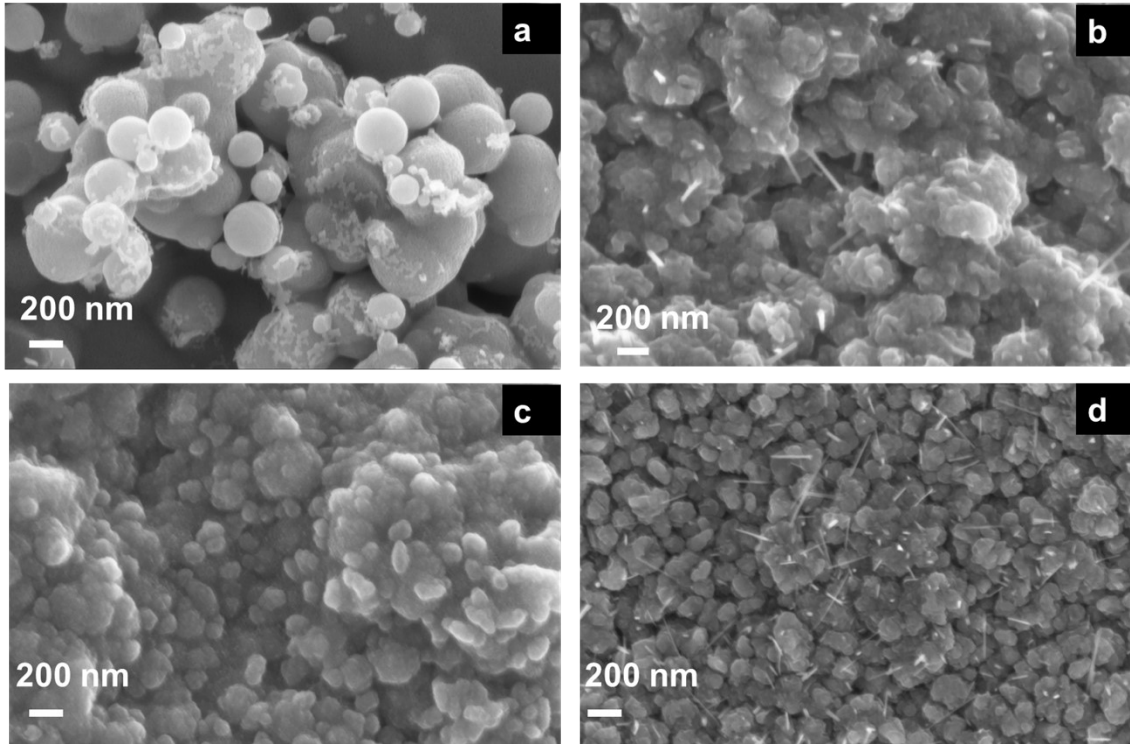

**Figure S4.** (a) Top-view SEM images of the as-anodized (a) 95Cu-5Zn, (b) 85Cu-15Zn, (c) 70Cu-30Zn, and (d) 100Cu samples.

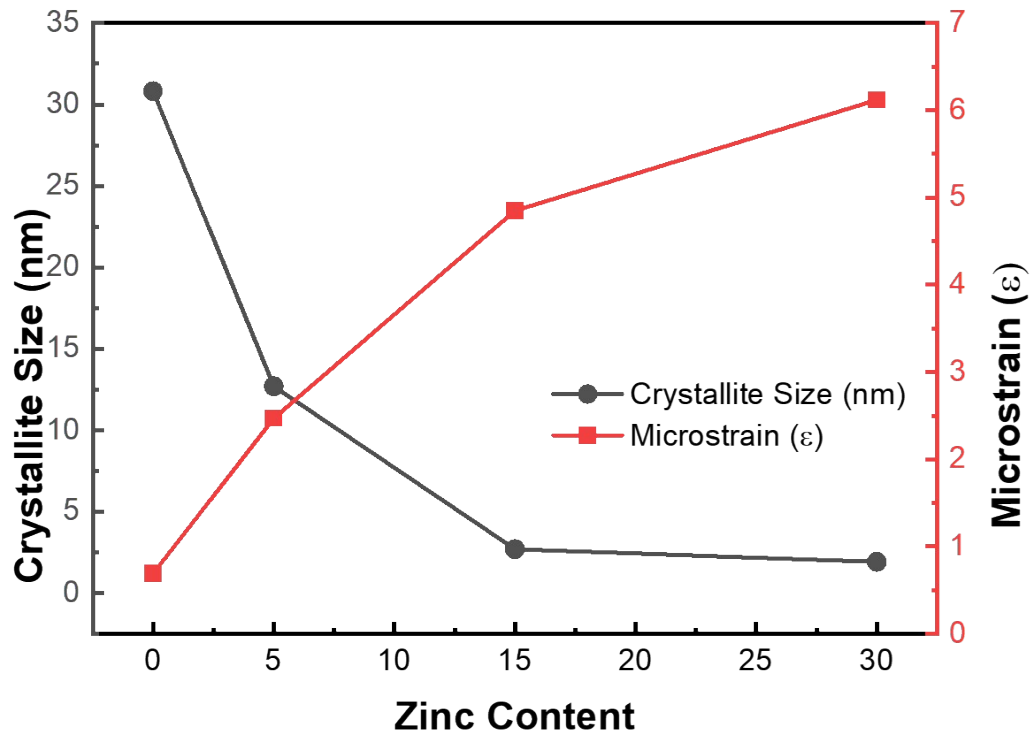

Figure S5. Crystallite size and microstrain vs Zinc content.

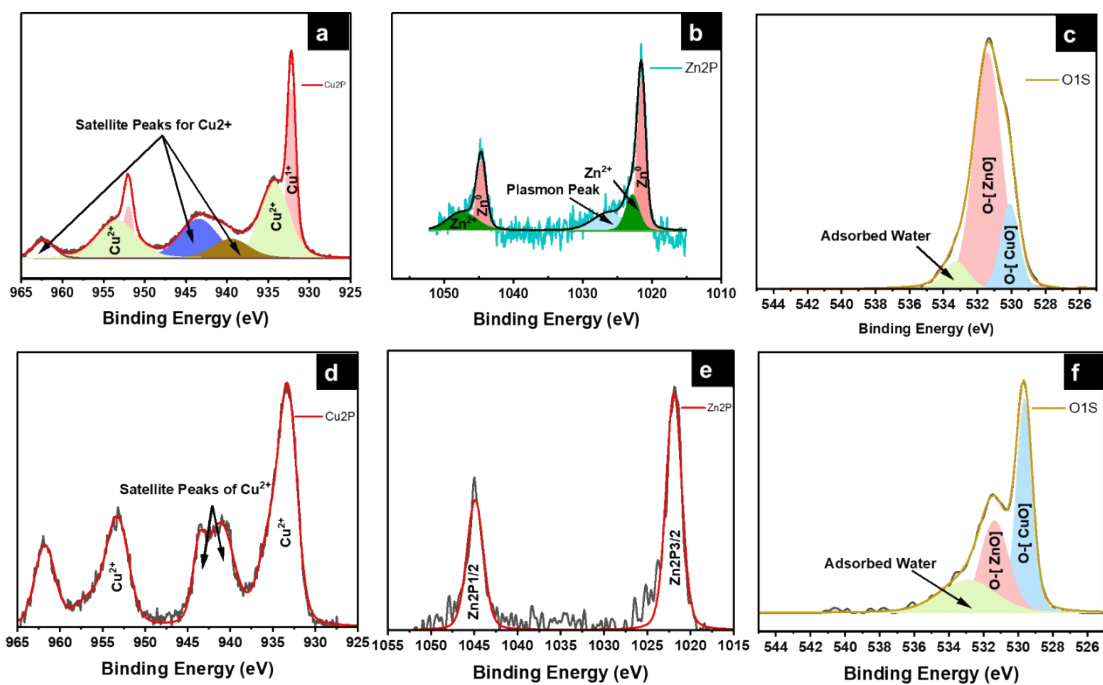

**Figure S6.** High-Resolution XPS results for as-anodized (a,b,c), and as-annealed (d,e,f) 85Cu-15Zn sample.

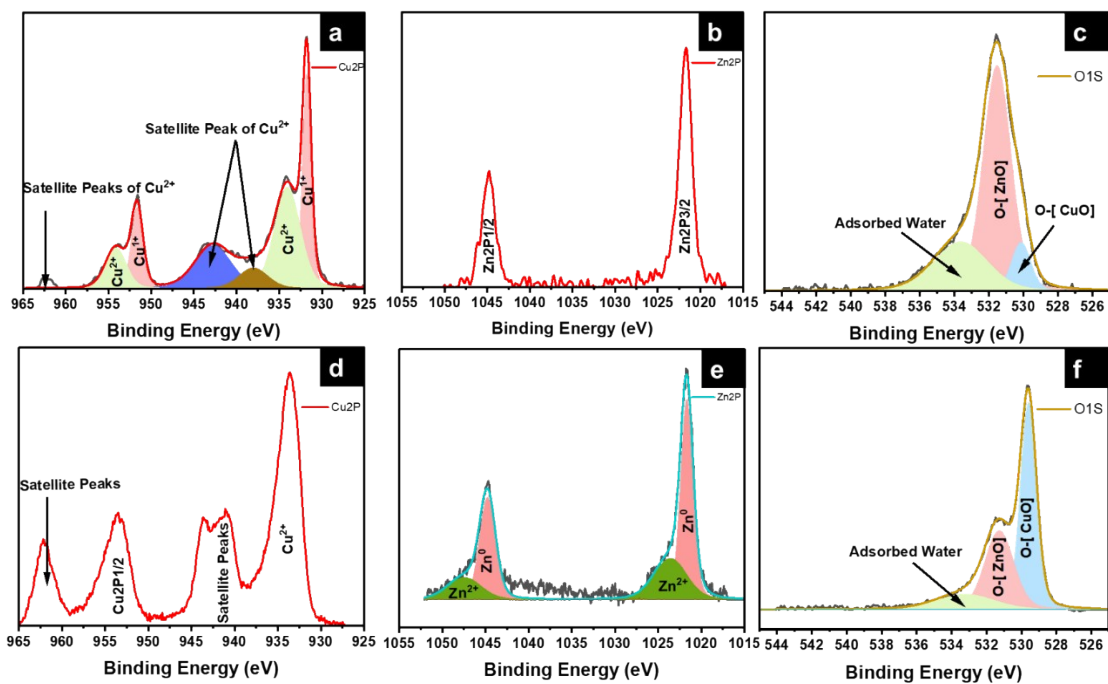

**Figure S7.** High Resolution XPS results for as-anodized (a,b,c), and as-annealed (d,e,f) 70Cu-30Zn sample.

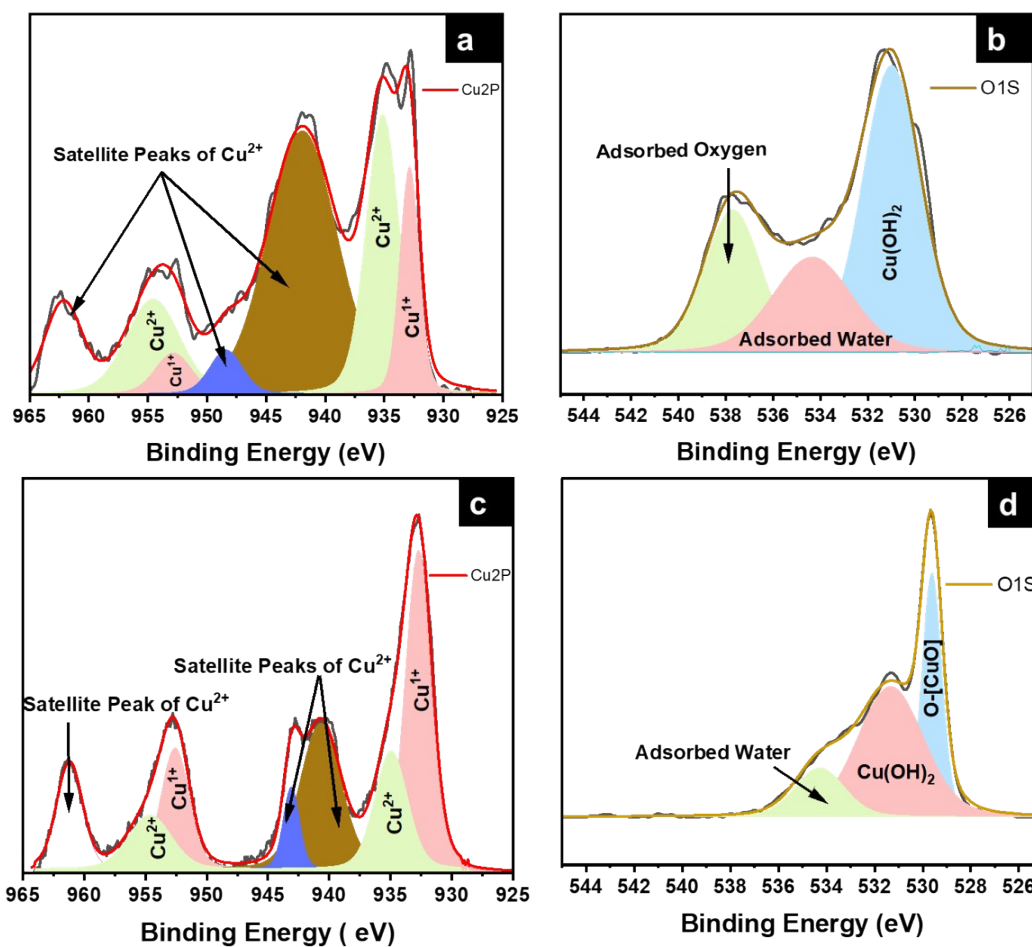

**Figure S8.** High-Resolution XPS results for as-anodized (a,b), and as-annealed (c,d) 100Cu sample.

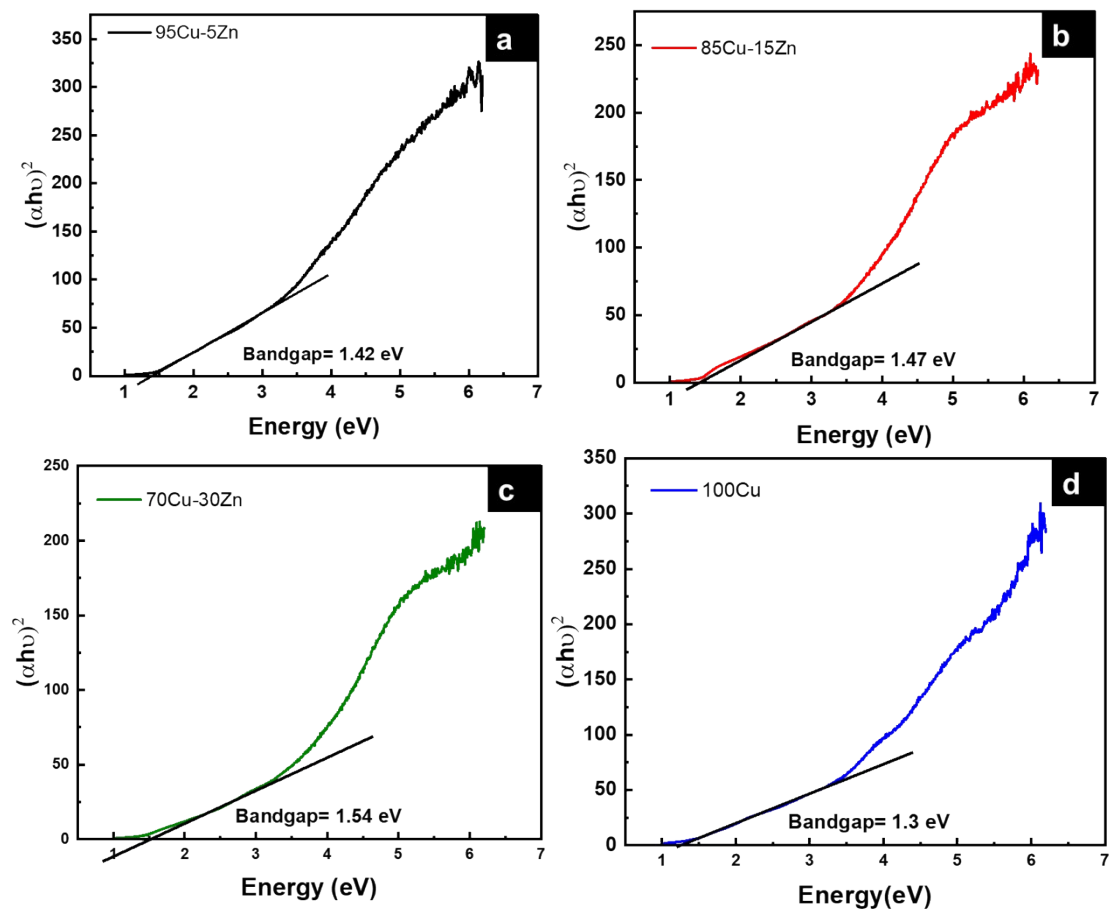

**Figure S9.** Band gap calculations for the (a) 95Cu-5Zn sample, (b) 85Cu-15Zn sample, (c) 70Cu-30Zn sample, and (d) 100 Cu samples.



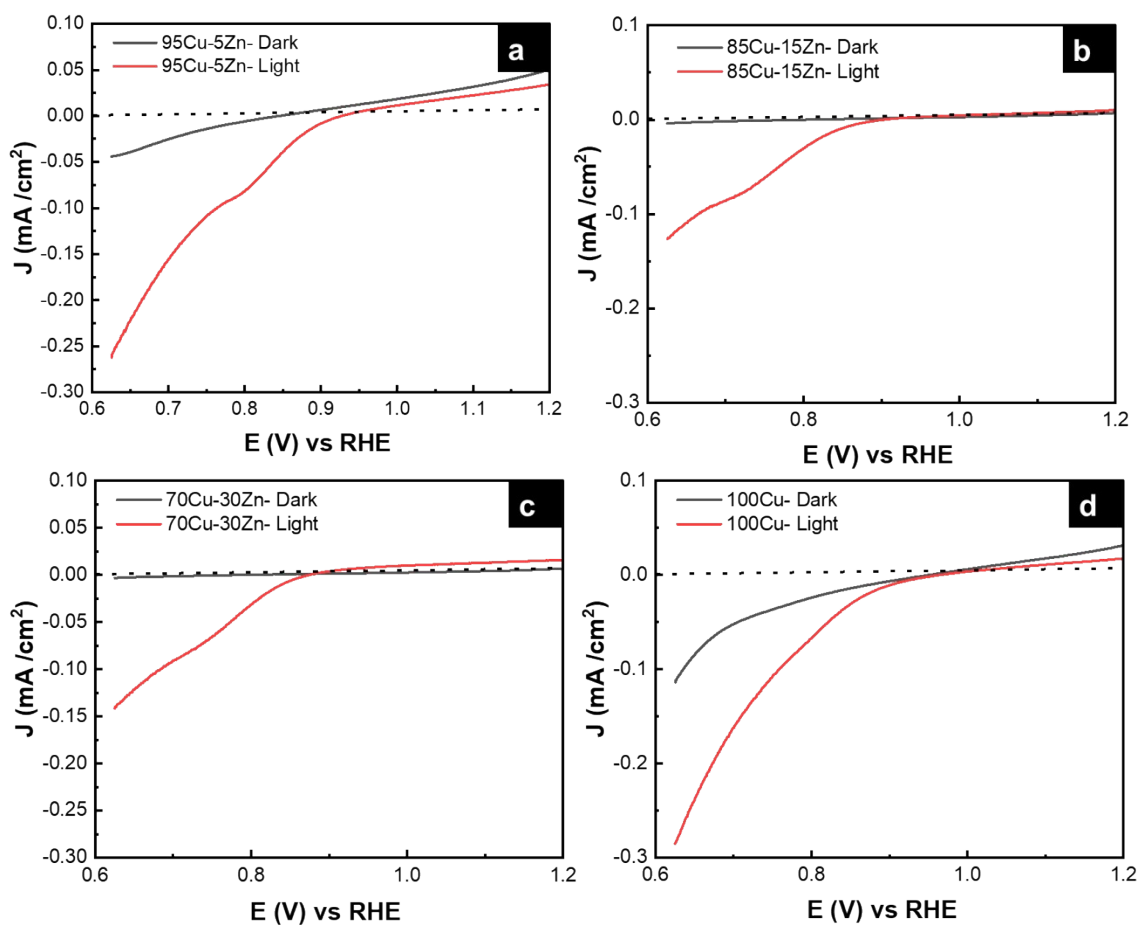

**Figure S10.** Linear sweep voltammetry (LSV) graphs for (a) 95Cu-5Zn, (b) 85Cu-15Zn, (c) 70Cu-30Zn, (d) 100Cu.

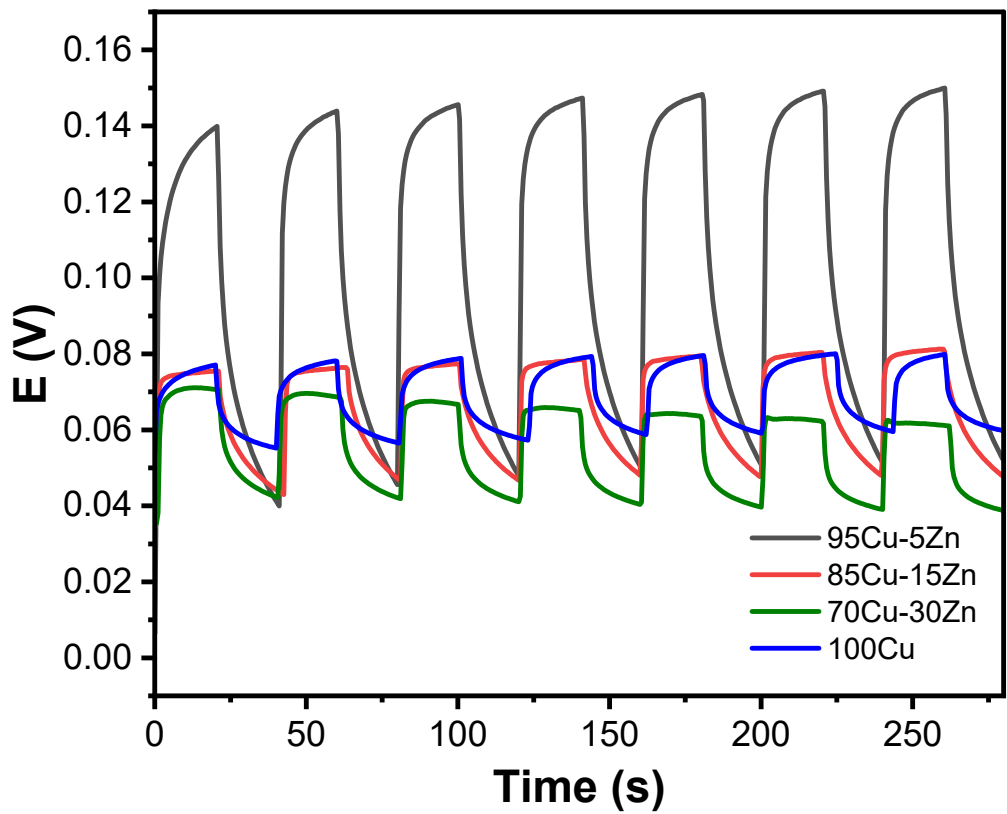

**Figure S11.** Open circuit potential (OCP) measurements while chopping illumination.

## Electrochemical Impedance Spectroscopy:

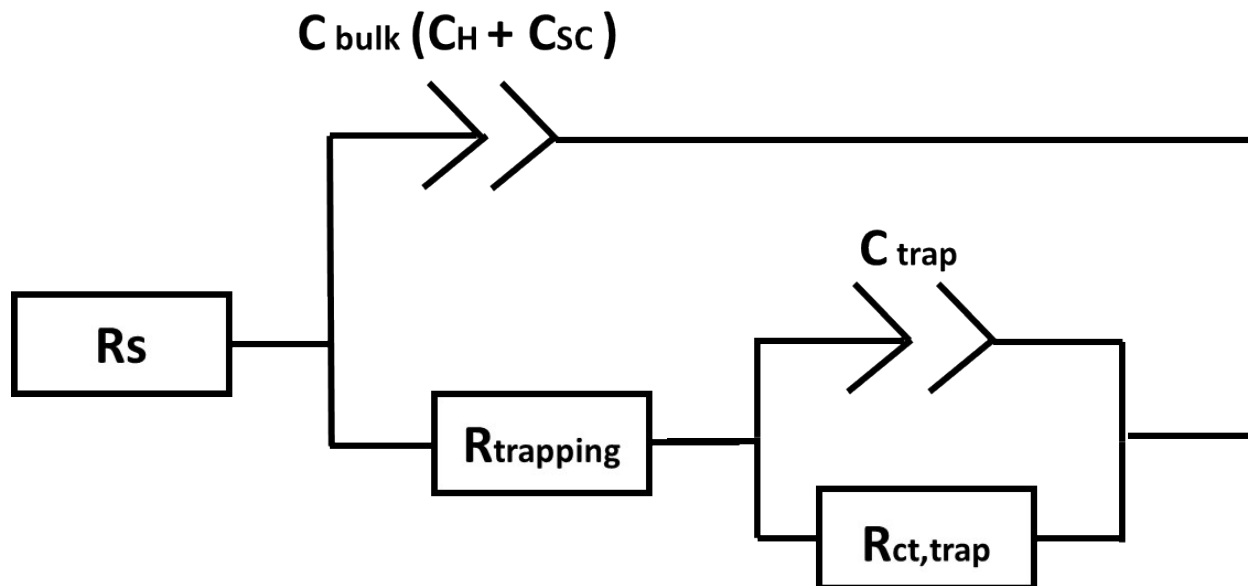

**Figure S12.** Equivalent circuit for electrochemical impedance spectroscopy data fitting.

**Figure S12** shows the equivalent circuit used to fit the EIS data, where  $R_s$  is the solution resistance and the resistance related to the wires and connections,  $C_{\text{bulk}}$  is the capacitance of the bulk,  $C_{sc}$  is the capacitance of the space charge layer inside the semiconductor, and  $C_H$  is the capacitance of the Helmholtz layer inside the electrolyte ( $C_{\text{bulk}}^{-1} = C_{sc}^{-1} + C_H^{-1}$ ),  $R_{\text{trapping}}$  is related to the charge trapping and detrapping at the surface states,  $R_{\text{ct, trap}}$  is associated with the charge transfer resistance from the surface states to the electrolyte, and  $C_{\text{trap}}$  related to the capacitive effect induced by charge accumulation in surface states. This equivalent circuit was used to fit the data in dark and under illumination, as shown in **Figure S13**.

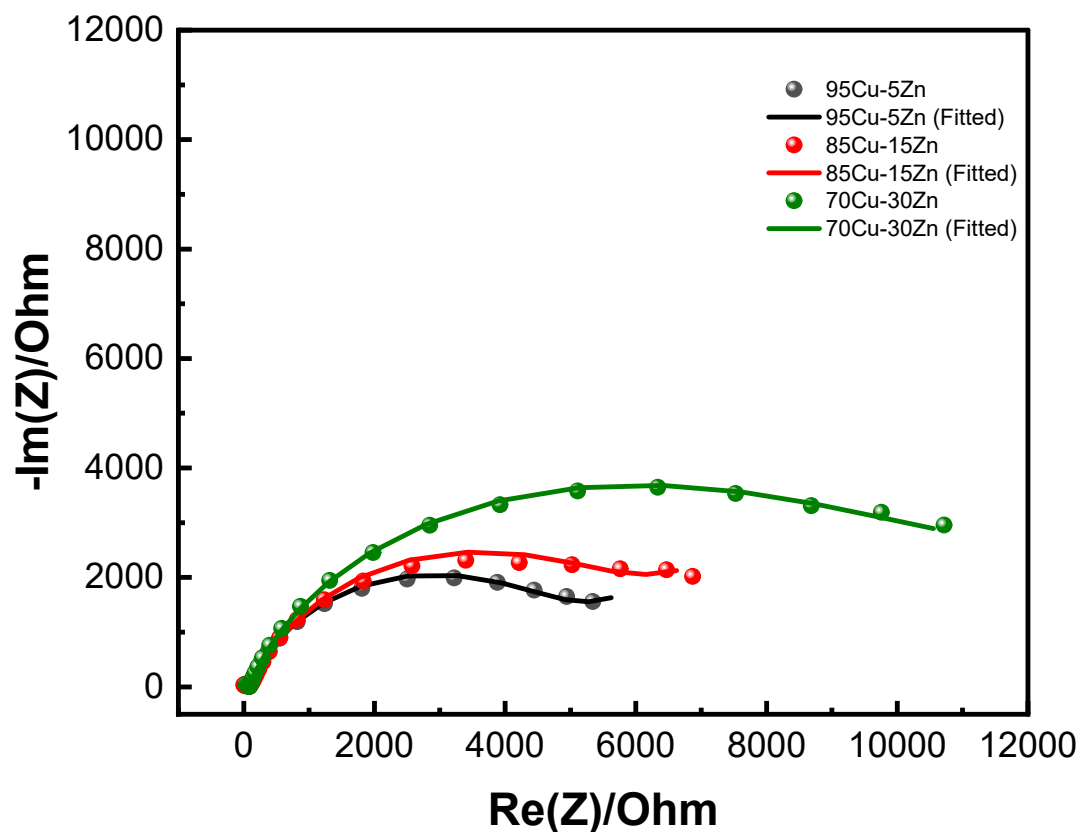

**Figure S13.** EIS Data under illumination at 0.62 V vs RHE.

To get more insight into the trapping of charges on the surface and to prove the existence of surface states,  $C_{\text{trap}}$  values at low frequencies are shown in **Figure S12 and Figure S 13**. The low frequency guarantees the low contribution of  $C_{\text{bulk}}$ . Therefore, we have chosen the frequency of 50 mHz to get the value of  $C_{\text{trap}}$  versus applied potential. In the dark and under illumination,

$C_{\text{trap}}$  shows a Gaussian peak for all samples shown through the fitting of the sample to a Gaussian function, which is a proof of the existence of surface states at around 0.8 V vs RHE.

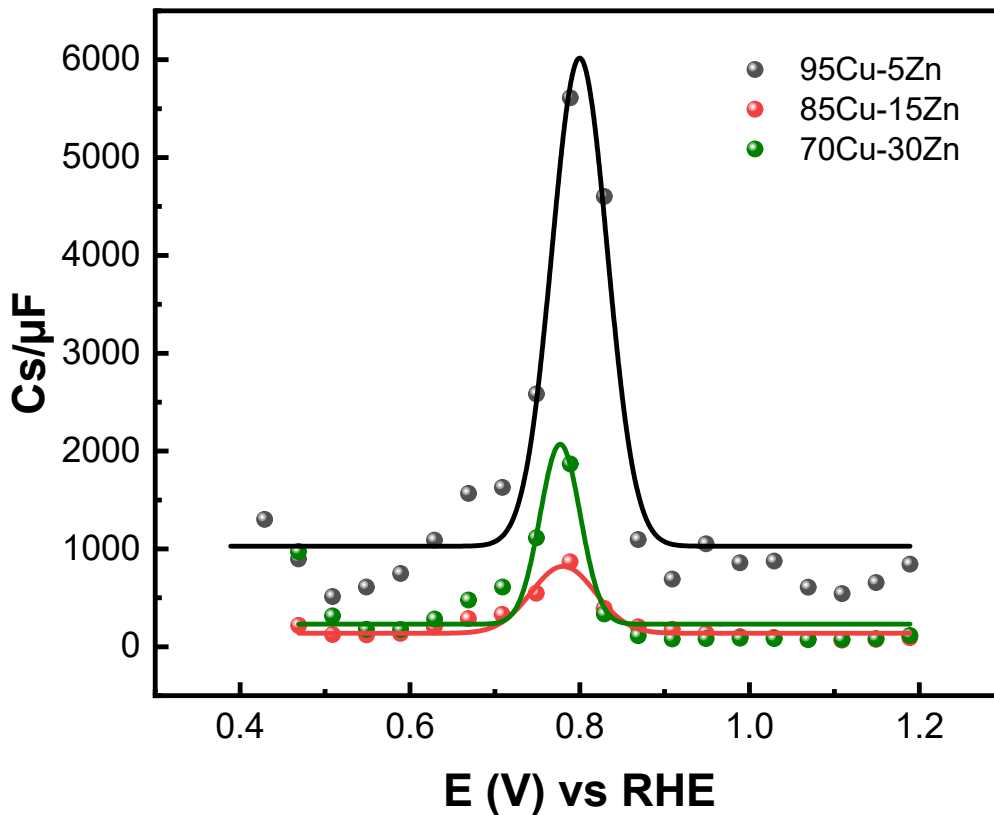

**Figure S14.** Capacitance versus applied potential graph in the dark.

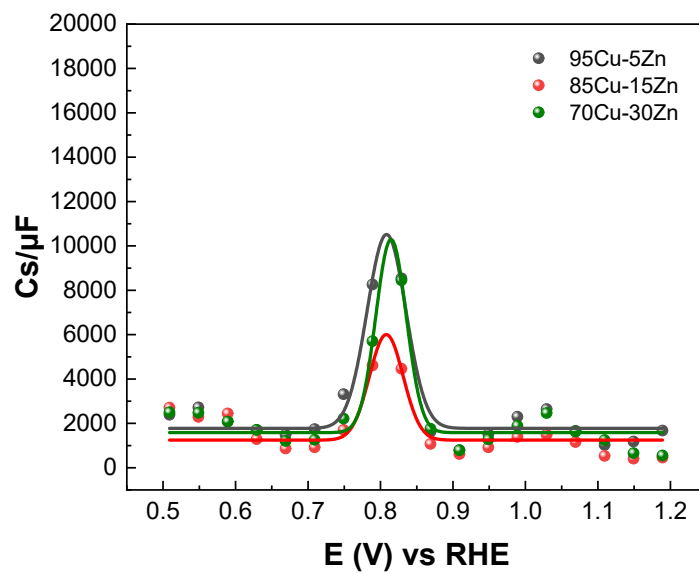

**Figure S15.** Capacitance versus applied potential graph under illumination.

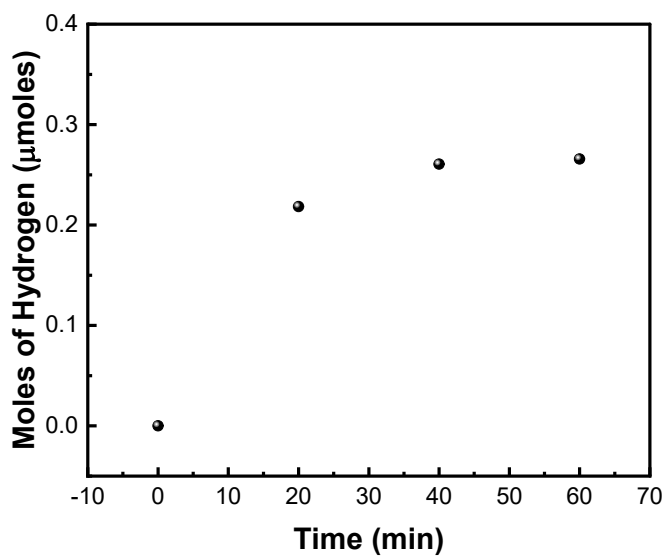

**Figure S16.** Amount of hydrogen produced within 60 minutes of continuous illumination by 95Cu-5Zn sample.

**Table S1.** The amount of hydrogen obtained upon the use of Cu-based photocathodes under close conditions to the ones used in our study.

| <b>Photocathode</b>                                                                                | <b>Experimental Conditions</b>                     | <b>Amount of Hydrogen evolved</b>                                            |
|----------------------------------------------------------------------------------------------------|----------------------------------------------------|------------------------------------------------------------------------------|
| CuFe <sub>x</sub> O <sub>y</sub><br><i>Green Chemistry</i> , 2020, <b>22</b> , 3141–3149           | Applying constant current of 10μA                  | 4.8 nmol cm <sup>-2</sup> (after one hour of continuous illumination)        |
| Carbon coated Cu <sub>2</sub> O nanowires<br><i>Appl Surf Sci</i> , 2015, <b>358</b> , 404–411     | At 0 V vs RHE                                      | ~ 6 μmol cm <sup>-2</sup> (after 16.6 min of continuous illumination)        |
| Li incorporated in CuAl <sub>2</sub> O <sub>4</sub><br><i>J Catal</i> , 2021, <b>400</b> , 218–227 | Applying a constant voltage of 0.4V vs RHE         | ~ 0.27 μmol cm <sup>-2</sup> (after one hour of continuous illumination)     |
| Li doped CuO<br><i>Nanoscale</i> , 2020, <b>12</b> , 7766–7775                                     | Applying a constant voltage of 0.3 V vs RHE        | ~ 0.2 nmol L <sup>-1</sup> (after 15 minutes of continuous illumination)     |
| <b>Cu-Zn</b><br><b>This work</b>                                                                   | <b>Applying a constant voltage of 0.6 V vs RHE</b> | <b>1.06 μmol cm<sup>-2</sup> (after one hour of continuous illumination)</b> |
